# Supplementary material for: Controlled synthesis and characterization of poly[methyl(3,3,3-trifluoropropyl)siloxane] with selective end groups
Source: Royal Society of Chemistry journal article supplement (doi:10.1039/c4ra12268b), 2014-01-01
Supplement: c4ra12268b1.pdf [file c4ra12268b1.pdf]

Electronic Supplementary Information for:

## Controlled Synthesis and Characterization of Poly[methyl(3,3,3-trifluoropropyl)siloxane] with Selective End Groups

Hua-Feng Fei<sup>a,b</sup>, Wenchun Xie<sup>a</sup>, Qian Wang<sup>a</sup>, Xiyin Gao<sup>a,b</sup>, Tao Hu<sup>a,b</sup>, Zhijie Zhang<sup>\*a</sup> and Zemin Xie<sup>a</sup>

<sup>a</sup>Beijing National Laboratory for Molecular Sciences (BNLMS), Institute of Chemistry, Chinese Academy of Sciences, Beijing 100190, China.

<sup>b</sup>Graduate University of Chinese Academy of Sciences, Beijing 100049, China.

**Corresponding Author: Dr. Zhijie Zhang**

E-mail: zhangzj@iccas.ac.cn

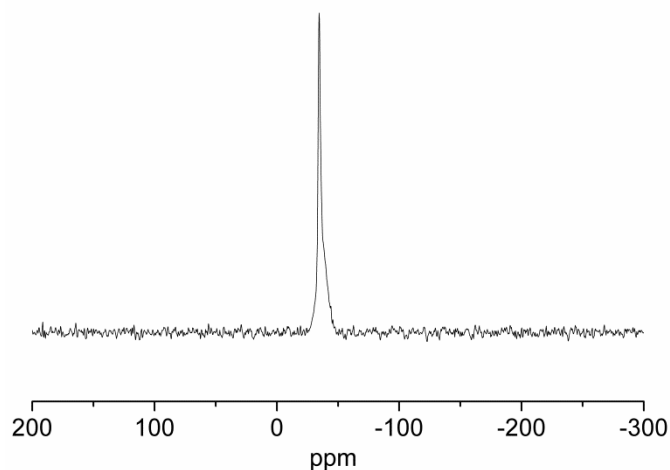

**Figure S1.** CP MAS <sup>29</sup>Si NMR spectra of initiator, Ph<sub>2</sub>Si(OLi)<sub>2</sub>.

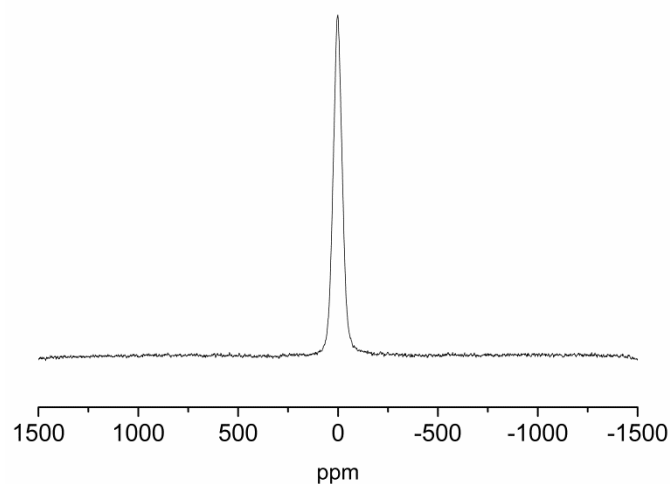

**Figure S2.** CP MAS <sup>7</sup>Li NMR spectra of initiator, Ph<sub>2</sub>Si(OLi)<sub>2</sub>.
